# Supplementary material for: Survey of the Human Pancreatic β-Cell G1/S Proteome Reveals a Potential Therapeutic Role for Cdk-6 and Cyclin D1 in Enhancing Human β-Cell Replication and Function In Vivo
Source: PubMed Central journal article supplement — Diabetes. 2009 Jan 9;58(4):882–93. doi: 10.2337/db08-0631 (PMC2661601; doi:10.2337/db08-0631), 2009-01-09

## Supplemental Table 1

### Primary Antisera Employed in the Human G1/S Proteome Analysis

| <b>Protein/<br/>Antibody</b> | <b>protein<br/>size</b> | <b>IB Company/cat #<br/>/dilution</b> | <b>ICC Company/cat #<br/>/dilution</b> |
|------------------------------|-------------------------|---------------------------------------|----------------------------------------|
| cdk1                         | 34                      | Cell Sig/9112/1:1000                  |                                        |
| cdk2                         | 34                      | Santa Cruz/sc-163/1:500               |                                        |
| cdk4                         | 34                      | Santa Cruz/sc-749/1:1000              | Abcam/3112/1:50                        |
|                              |                         | Abcam/3112/1:1000                     |                                        |
|                              |                         | Santa-Cruz/sc-260G/1:1000             |                                        |
| cdk6                         | 40                      | Santa Cruz/sc 177/1:1000              | Abcam/3126/1:50                        |
|                              |                         | Abcam/3126/1:500                      |                                        |
|                              |                         | Sigma/c-8343/1:500                    |                                        |
| c-myc                        | 50                      | Santa Cruz/sc-764/1:500               |                                        |
| cyclin D1                    | 36                      | Santa cruz/sc718/1:1000               |                                        |
| cyclin D2                    | 34                      | Neomarkers/ms-221/1:500               |                                        |
| cyclin D3                    | 35                      | Abcam/28283/1:500                     |                                        |
| cyclin A                     | 60                      | Sigma/c-4710/1:500                    |                                        |
| cyclin E                     |                         | Santa Cruz/sc-247/1:1000              |                                        |
| p15                          | 15                      | Neomarkers/ab-3/1:500                 |                                        |
| p16                          | 16                      | Santa Cruz/sc1661/1:1000              |                                        |
| p18                          | 18                      | Santa Cruz/sc-1064/1:500              |                                        |
| p19                          | 19                      | Santa Cruz/sc-1064/1:500              |                                        |
| p21                          | 21                      | Santa Cruz/sc-6246/1:500              |                                        |
| p27                          | 27                      | Pharmingen/554069/1:2000              |                                        |
| p53                          | 53                      | Biomeda/v1003/1:200                   |                                        |
| p57                          | 57                      | Genetex/1:250                         |                                        |
| mdm2                         |                         | Calbiochem/op115/1:500                |                                        |
| Rb                           | 115                     | Pharmingen/1:500                      |                                        |
| p107                         | 107                     | Santa Cruz/sc-318/1:1000              |                                        |
| p130                         | 130                     | Pharmingen/1:500                      |                                        |
| E2F1                         | 75                      | Calbiochem/NA49/1:200                 |                                        |
| E2F2                         | 55                      | Santa Cruz/sc-9967/1:250              |                                        |
| E2F4                         | 60                      | Santa Cruz/sc-1062/1:1000             |                                        |
| E2F6                         | 35                      | Santa Cruz /sc-8366/1:200             |                                        |
| ld1                          | 15                      | Santa Cruz/sc-488/1:250               |                                        |
| ld2                          |                         | Santa Cruz/sc-489/1:200               |                                        |
| ld3                          |                         | Santa Cruz/sc-490/1:200               |                                        |
| ld4                          |                         | Santa Cruz/sc-491/1:200               |                                        |
| Menin                        |                         | Santa Cruz/1:500                      |                                        |
| Cleaved<br>caspase-3         | 17                      | Cell Signaling/ASP175/1:1000          |                                        |
| Brdu                         |                         |                                       | Abcam/6326 / 1:200                     |
| Insulin                      |                         |                                       | Zymed/0067/1:200                       |
| Actin                        |                         | Sigma/1:2000                          |                                        |
| Tubulin                      |                         | Calbiochem/cp06/1:2000                |                                        |

## Supplemental Figure Legends

**Supplemental Figure 1. A schematic description of the human “G1/S proteome”.** Molecules shown in green are cell cycle activators and those in red are inhibitors. See text for details.

**Supplemental Figure 2. Co-staining for BrdU, somatostatin, and glucagon in the islets from Panel A.** The majority of proliferating cells are insulin-positive cells. Few alpha or delta cells are BrdU+. The remaining BrdU+ cells are likely ductal, endothelial, acinar cells or fibroblasts, as would be expected when using an adenovirus with a generalized promoter, such as the CMV promoter.

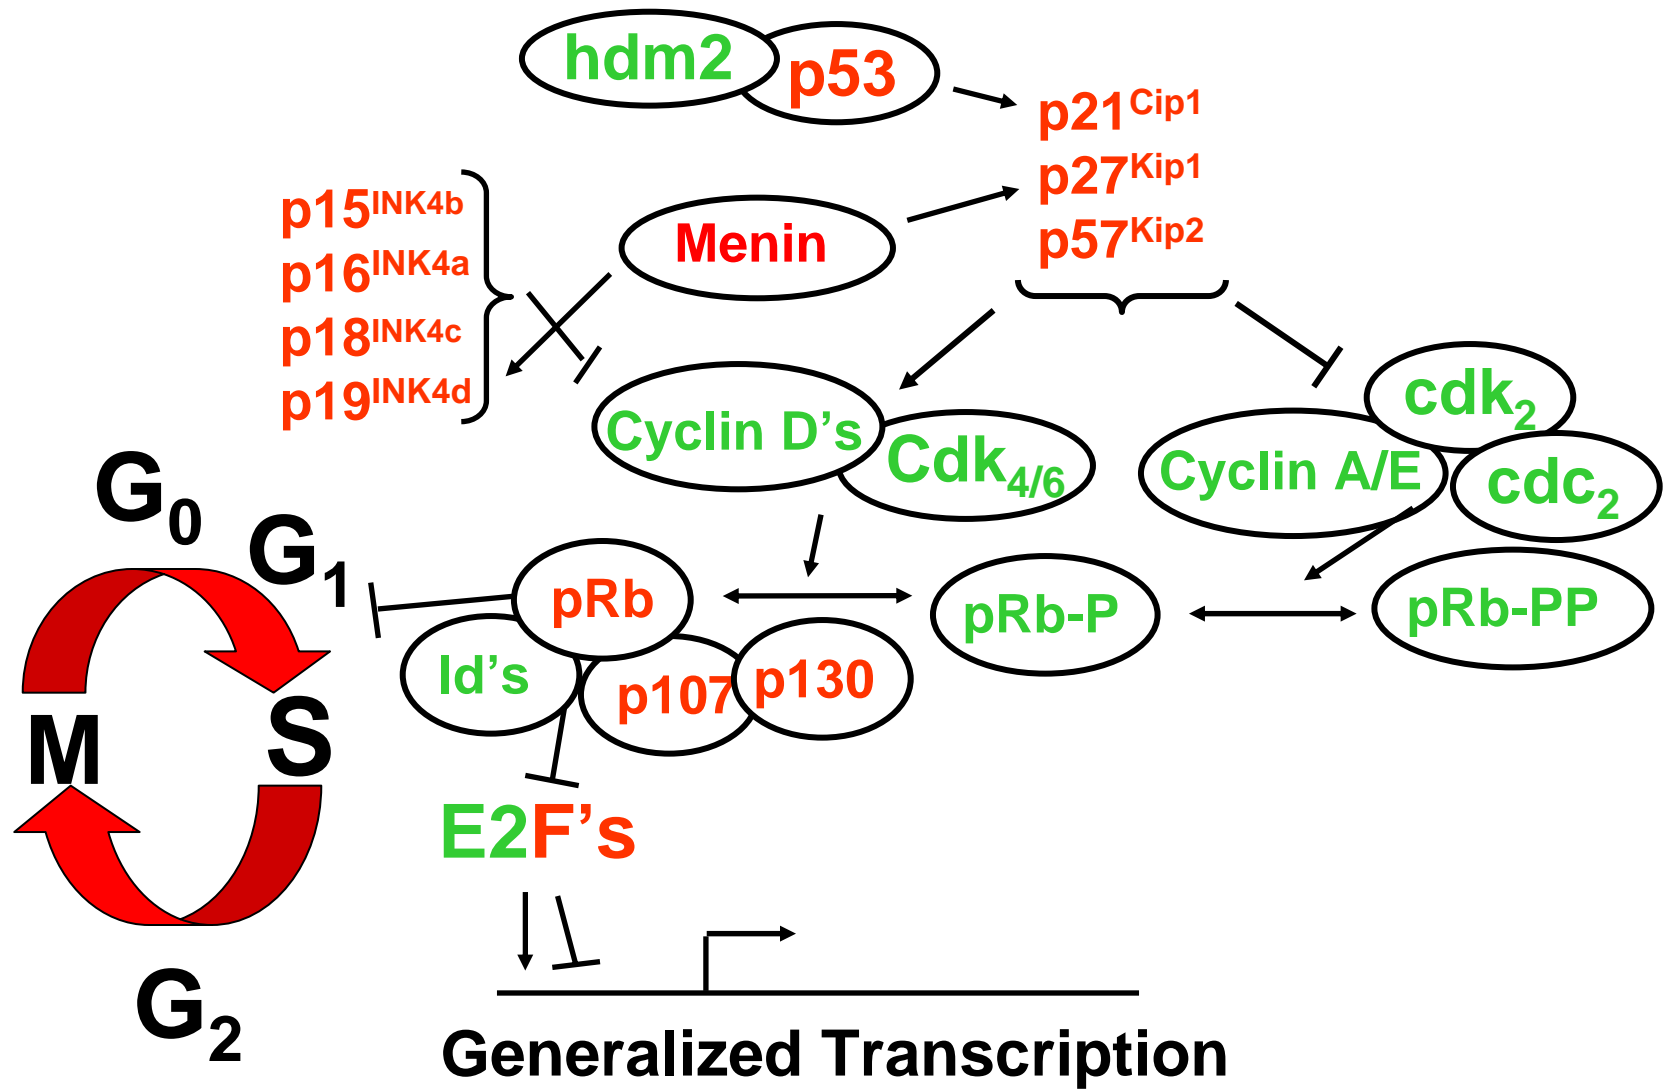

Supplemental Figure 1

# Supplemental Figure 2

Ad.LZ

Insulin / BrdU

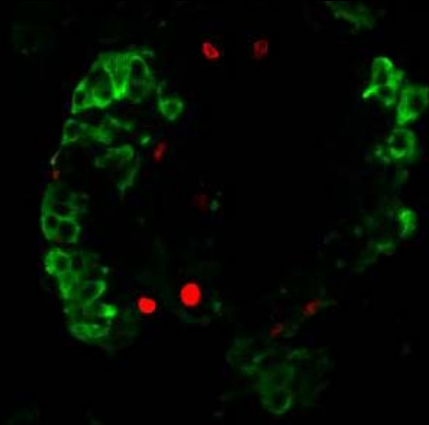

Glucagon / BrdU

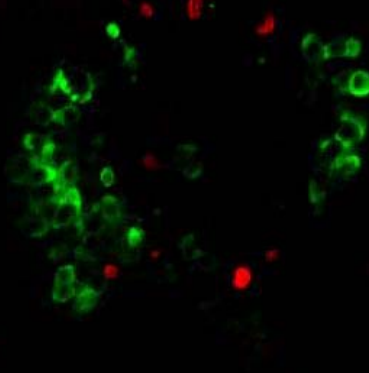

Somatostatin / BrdU

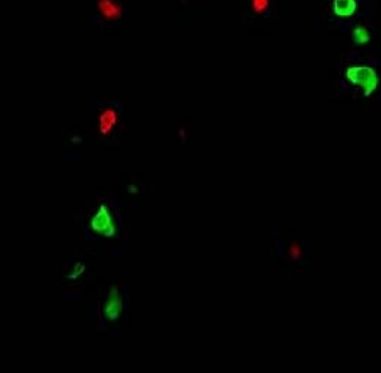

Ad.cdk6 + D<sub>1</sub>

Insulin / BrdU

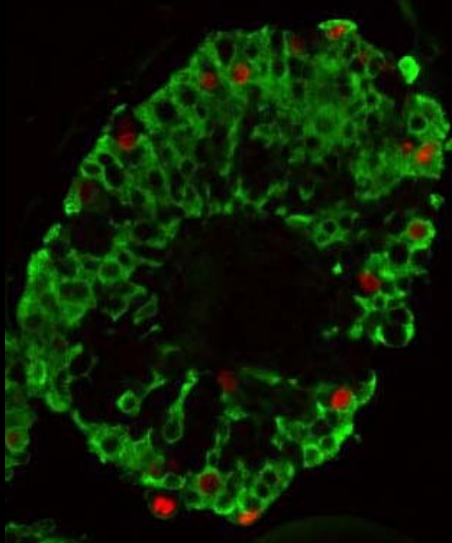

Glucagon / BrdU

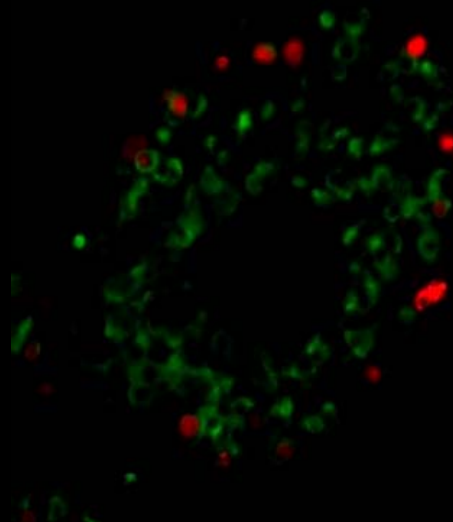

Somatostatin / BrdU

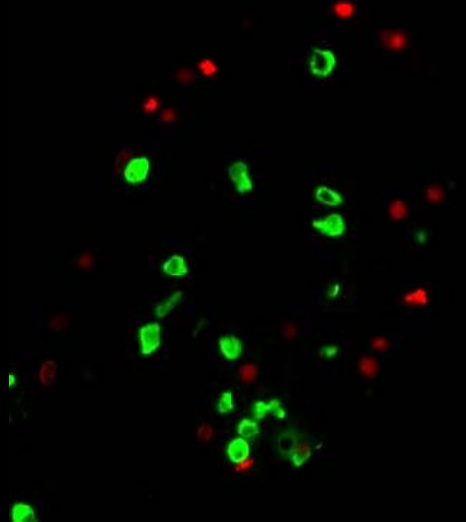

Supplement: supp_db08-0631_db08-06311.suppl.pdf [file supp_db08-0631_db08-06311.suppl.pdf]
